# Supplementary material
Source: MDPI journal article supplement (https://www.mdpi.com/2075-163X/12/11/1421)
Supplement: s1 [file s1]

SUPPLEMENTARY INFORMATION FOR:

# **Morpho-Constitutional Classification of Urinary Stones as Prospective Approach for the Management of Human Pathological Biomineralization: New Insights from Southern Italy**

**Francesco Izzo <sup>1</sup>, Alessio Langella <sup>1</sup>, Chiara Germinario <sup>2</sup>, Celestino Grifa <sup>2</sup>, Ettore Varricchio <sup>2</sup>, Maria Chiara Di Meo <sup>2</sup>, Luigi Salzano <sup>3</sup>, Giuseppe Lotrecchiano <sup>3</sup> and Mariano Mercurio <sup>2,\*</sup>**

<sup>1</sup> Department of Earth Sciences, Environment and Resources, University of Naples Federico II, Via Cintia, 80126 Naples, Italy

<sup>2</sup> Department of Science and Technology, University of Sannio, Via de Sanctis snc, 82100 Benevento, Italy

<sup>3</sup> UOC Urology, San Pio Hospital, Via dell'Angelo, 82100 Benevento, Italy

\* Correspondence: [mariano.mercurio@unisannio.it](mailto:mariano.mercurio@unisannio.it)

**Table S1.** Analytical techniques applied for the characterization of human urinary stones. Note: SM, stereomicroscopy; PLM, polarized light microscopy; scanning electron microscopy; FTIR, Fourier transform infrared spectroscopy.

| n. | ID Sample | SM | PLM | SEM | FTIR |
|----|-----------|----|-----|-----|------|
| 1  | KS001     | x  |     |     | x    |
| 2  | KS002     | x  |     |     | x    |
| 3  | KS003     | x  |     |     | x    |
| 4  | KS004     | x  | x   |     | x    |
| 5  | KS005     | x  |     |     | x    |
| 6  | KS006B    | x  | x   | x   | x    |
| 7  | KS007     | x  | x   |     | x    |
| 8  | KS008     | x  | x   | x   | x    |
| 9  | KS009     | x  |     |     | x    |
| 10 | KS010     | x  |     |     | x    |
| 11 | KS011B    | x  | x   |     | x    |
| 12 | KS012B    | x  | x   |     | x    |
| 13 | KS013     | x  | x   | x   |      |
| 14 | KS014     | x  | x   |     | x    |
| 15 | KS015     | x  |     |     | x    |
| 16 | KS016     | x  | x   |     | x    |
| 17 | KS017     | x  |     |     | x    |
| 18 | KS018     | x  |     |     | x    |
| 19 | KS020B    | x  | x   |     | x    |
| 20 | KS021     | x  |     |     | x    |
| 21 | KS022B    | x  | x   |     | x    |
| 22 | KS023B    | x  | x   |     | x    |
| 23 | KS024     | x  |     |     | x    |
| 24 | KS025     | x  |     |     | x    |
| 25 | KS026     | x  | x   |     | x    |
| 26 | KS027     | x  |     | x   | x    |
| 27 | KS028B    | x  |     | x   | x    |
| 28 | KS029B    | x  |     |     | x    |
| 29 | KS030     | x  | x   | x   | x    |
| 30 | KS031     | x  | x   |     | x    |
| 31 | KS032B    | x  |     | x   | x    |
| 32 | KS033B    | x  |     |     | x    |
| 33 | KS034B    | x  |     |     | x    |
| 34 | KS035B    | x  |     |     | x    |
| 35 | KS036B    | x  |     |     | x    |
| 36 | KS037B    | x  |     |     | x    |
| 37 | KS038B    | x  |     |     | x    |
| 38 | KS039     | x  |     | x   | x    |
| 39 | KS040     | x  |     |     | x    |
| 40 | KS041     | x  |     | x   | x    |
| 41 | KS043     | x  |     |     | x    |
| 42 | KS044     | x  |     | x   | x    |
| 43 | KS045     | x  |     |     | x    |
| 44 | KS046     | x  |     |     | x    |
| 45 | KS047     | x  |     |     | x    |
| 46 | KS048     | x  |     |     | x    |
| 47 | KS049     | x  |     |     | x    |
| 48 | KS050B    | x  |     |     | x    |
| 49 | KS051B    | x  |     |     | x    |

**Table S2a** - FTIR data for CaOx urinary stones (wavenumbers expressed in cm<sup>-1</sup>).

| KS001 | KS004 | KS005 | KS010 | KS012B | KS014 | KS017 | KS018 | KS021 | KS024 | KS025 | KS026 | KS027 | KS028B | KS030 | KS031 | KS033B | KS036B | KS040 | KS044 | KS045 | KS048 | KS049 | KS051 | Average | Chemical phases                  |
|-------|-------|-------|-------|--------|-------|-------|-------|-------|-------|-------|-------|-------|--------|-------|-------|--------|--------|-------|-------|-------|-------|-------|-------|---------|----------------------------------|
| 3428  | 3425  | 3444  | 3426  | 3440   | 3423  | 3429  | 3427  | 3446  | 3428  | 3429  | 3427  | 3427  | 3462   | 3429  | 3428  | 3427   | 3439   | 3426  | 3425  | 3423  | 3462  | 3423  | 3427  | 3432    | Calcium Oxalate                  |
| 3325  | 3337  | 3336  | 3324  | 3318   | 3326  | 3335  | 3324  | 3327  | 3337  | 3328  | 3332  | 3325  | 3325   | 3323  | 3335  | 3329   | 3324   | 3338  | 3330  | 3336  | 3349  | 3331  | 3337  | 3331    | Calcium Oxalate                  |
| 3246  | 3245  | 3235  | 3245  | 3225   | 3248  | 3234  | 3232  | 3225  | 3233  | 3240  | 3246  | 3247  | 3246   | 3240  | 3248  | 3244   | 3236   | 3240  | 3246  | 3248  | 3242  | 3243  | 3245  | 3241    | Calcium Oxalate                  |
| 3057  | 3047  | 3047  | 3044  | 3043   | 3049  | 3051  | 3042  | 3014  | 3050  | 3047  | 3044  | 3044  | 3087   | 3053  | 3041  | 3047   | 3054   | 3044  | 3044  | 3045  | 3092  | 3056  | 3048  | 3050    | Calcium Oxalate                  |
|       |       |       | -     | -      | -     | -     | -     | -     | -     | -     | -     | -     | -      | -     | -     | -      | -      | -     | -     | 2953  | -     | -     | -     | 2953    | Organic matter                   |
|       | 2931  | 2938  | -     | -      | -     | 2938  | -     | 2822  |       | 2934  | -     | -     | -      | -     | -     | -      | 2928   | -     | 2934  | 2916  | 2920  | 2929  | -     | 2919    | Organic matter                   |
|       |       |       | -     | -      | -     | -     | -     | -     | -     | -     | -     | -     | -      | -     | -     | -      | -      | -     | -     | 2848  | 2841  | 2850  | -     | 2846    | Organic matter                   |
|       |       |       | -     | -      | -     | -     | -     | -     | -     | -     | -     | -     | -      | -     | -     | -      | -      | -     | -     | 1733  | -     | -     | -     | 1733    | Organic matter                   |
| 1612  | 1610  | 1615  | 1610  | 1610   | 1611  | 1612  | 1612  | 1612  | 1615  | 1613  | 1611  | 1611  | 1618   | 1609  | 1613  | 1610   | 1615   | 1615  | 1612  | 1611  | 1615  | 1608  | 1612  | 1612    | Calcium Oxalate                  |
|       |       |       | -     | -      | -     | -     | -     | -     | -     | -     | -     | -     | -      | -     | -     | -      | -      | -     | -     | 1472  | 1473  | -     | -     | 1472    | Calcium Phosphate/Organic matter |
|       |       |       | -     | -      | -     | -     | -     | 1437  | -     | -     | -     | -     | -      | -     | -     | -      | -      | -     | -     | 1463  | -     | -     | -     | 1450    | Calcium Phosphate/Organic matter |
| 1364  | 1380  | 1367  | 1367  | 1380   | 1367  | 1366  | 1380  | 1381  | 1379  | 1368  | 1366  | 1368  |        | 1367  | 1379  | 1367   |        | 1368  | 1374  | 1377  | -     | 1380  | 1368  | 1372    | Calcium Oxalate                  |
| 1315  | 1313  | 1315  | 1313  | 1313   | 1314  | 1314  | 1314  | 1313  | 1314  | 1314  | 1314  | 1313  | 1320   | 1313  | 1314  | 1313   | 1316   | 1313  | 1313  | 1313  | 1318  | 1313  | 1313  | 1314    | Calcium Oxalate                  |
|       |       |       | -     | -      | -     | -     | -     | 1123  | -     | -     | -     | -     | -      | -     | -     | -      | -      | -     | 1124  | -     | -     | -     | -     | 1123    | Uric acid                        |
| 1044  | 1053  | 1067  | 1095  | 1044   | 1100  | 1096  | 1038  | 1027  | 1079  | 1081  | 1090  | 1111  | 1034   | 1096  | 1087  | 1087   | 1101   | 1088  | -     | 1069  | 1037  | 1096  | 1063  | 1073    | Calcium Phosphate                |
|       |       |       | -     | -      | -     | -     | -     | 992   | -     | -     | -     | -     | -      | -     | -     | -      | -      | -     | 992   | -     | -     | 1013  | -     | 999     | Uric acid                        |
| 947   | 946   | 949   | 947   | 952    | 947   | 948   | 949   | 948   | 948   | 946   | 947   | 947   | 914    | 948   | 948   | 946    | -      | 947   | 948   | 953   | 959   | 945   | 949   | 947     | Calcium Oxalate                  |
| 915   |       |       | -     | -      | -     | -     | -     | -     | -     | -     | -     | -     | -      | -     | -     | -      | 913    | -     | -     | -     | 914   | -     | -     | 914     | Calcium Phosphate                |
| 884   | 878   | 884   | 884   | 886    | 885   | 884   | 883   | 880   | 884   | 885   | 885   | 885   |        | 885   | 884   | 885    |        | 886   | 885   | 886   | 886   | 863   | 885   | 883     | Calcium Oxalate                  |
| 779   | 779   | 779   | 779   | 779    | 779   | 779   | 779   | 779   | 779   | 779   | 779   | 779   | 779    | 779   | 779   | 779    | 779    | 779   | 779   | 779   | 780   | 779   | 779   | 779     | Calcium Oxalate                  |
|       |       |       | -     | -      | -     | -     | -     | 745   | -     | -     | -     | -     | -      | -     | -     | -      | -      | -     | -     | -     | -     | -     | -     | -       | Uric acid                        |
| 646   | 658   | 659   | 657   | 656    | 658   | 657   | 658   | 653   | 659   | 657   | 658   | 656   | -      | 656   | 659   | 656    | -      | 660   | 657   | 654   | -     | 659   | 664   | 657     | Calcium Oxalate                  |
| 600   | 601   | 601   | 597   | 597    | 595   | 598   | 600   | 619   | 598   | 599   | 597   | 596   | 602    | 596   | 596   | 596    | 603    | 603   | 594   | 591   | 602   | 599   | 600   | 599     | Calcium Oxalate                  |
|       |       |       | -     | -      | -     | -     | -     | 574   | -     | -     | -     | -     | -      | -     | -     | -      | -      | -     | -     | -     | 563   | -     | 574   | -       | Calcium Phosphate/Uric acid      |
| 513   | 513   | 513   | 514   | 511    | 513   | 513   | 513   | 514   | 515   | 513   | 513   | 513   | 514    | 512   | 514   | 513    | 513    | 513   | 514   | 513   | 514   | 512   | 513   | 513     | Calcium Oxalate                  |
|       |       |       | -     | -      | -     | -     | -     | 475   | -     | -     | -     | 421   | -      | -     | -     | -      | -      | -     | -     | -     | -     | -     | -     | -       | Uric acid                        |

**Table S2b** - FTIR data for UA urinary stones (wavenumbers expressed in cm<sup>-1</sup>).

| KS003 | KS009 | KS011B | KS015 | KS016 | KS020B | KS022B | KS023B | KS029B | KS034B | KS035B | KS037B | KS038B | KS039 | KS046 | KS050B | Average | Chemical phases           |
|-------|-------|--------|-------|-------|--------|--------|--------|--------|--------|--------|--------|--------|-------|-------|--------|---------|---------------------------|
| -     | -     | -      | 3436  | -     | -      | -      | -      | -      | -      | -      | 3446   | -      | 3444  | -     | -      | 3442    | Calcium Oxalate           |
| -     | -     | -      | -     | -     | -      | -      | -      | -      | -      | -      | -      | -      | 3322  | -     | -      | 3322    | Calcium Oxalate           |
| 3090  | 3078  | 3089   | 3089  | 3088  | 3084   | 3082   | 3088   | 3082   | 3099   | 3089   | 3079   | 3095   | 3089  | 3101  | 3082   | 3088    | Uric acid                 |
| 2991  | 2992  | 2992   | 3000  | 2998  | 2996   | 2992   | 3005   | 2991   | 3000   | 2999   | 2994   | 2991   | 2994  | 2992  | 2991   | 2995    | Uric acid                 |
| 2917  | 2914  | 2918   | 2918  | 2918  | 2912   | 2914   | 2917   | 2920   | 2926   | 2915   | 2915   | 2923   | 2924  | 2912  | 2916   | 2917    | Uric acid                 |
| -     | -     | -      | -     | -     | -      | -      | -      | -      | -      | -      | -      | -      | -     | -     | 2847   | 2847    | Organic matter            |
| -     | -     | -      | -     | -     | -      | -      | -      | -      | -      | -      | -      | -      | -     | -     | 2818   | 2818    | Organic matter            |
| 2789  | 2788  | 2788   | 2808  | 2814  | 2785   | 2787   | 2793   | 2788   | 2792   | 2794   | 2787   | 2785   | 2802  | 2779  | 2792   | 2792    | Uric acid                 |
| 2692  | 2694  | 2687   | 2695  | 2692  | 2680   | 2687   | 2684   | 2693   | 2693   | 2689   | 2697   | 2690   | 2693  | 2689  | 2689   | 2690    | Uric acid                 |
| 2606  | 2606  | 2605   | 2606  | 2606  | 2609   | 2600   | 2603   | 2606   | 2598   | 2605   | 2605   | 2602   | 2605  | 2606  | 2604   | 2605    | Uric acid                 |
| 1659  | 1656  | 1661   | 1662  | 1661  | 1654   | 1662   | 1662   | 1660   | 1664   | 1654   | 1654   | 1654   | 1652  | 1654  | 1661   | 1658    | Uric acid                 |
| 1584  | 1584  | 1584   | 1586  | 1585  | 1585   | 1584   | 1585   | 1585   | 1586   | 1584   | 1586   | 1584   | 1587  | 1577  | 1585   | 1584    | Uric acid                 |
| 1483  | 1483  |        | 1484  | 1484  | 1490   | 1485   | 1485   | 1484   | 1490   | 1490   | 1489   | 1482   | 1486  | 1483  | 1485   | 1486    | Uric acid                 |
| 1434  | 1434  | 1435   | 1435  | 1434  | 1434   | 1435   | 1435   | 1434   | 1436   | 1436   | 1436   | 1435   | 1436  | 1433  | 1435   | 1435    | Uric acid                 |
| 1399  | 1399  | 1398   | 1400  | 1399  | 1399   | 1399   | 1399   | 1399   | 1399   | 1399   | 1398   | 1398   | 1399  | 1405  | 1398   | 1399    | Uric acid                 |
| 1347  | 1347  | 1347   | 1348  | 1347  | 1347   | 1347   | 1347   | 1347   | 1348   | 1348   | 1348   | 1347   | 1348  | 1349  | 1348   | 1348    | Uric acid                 |
| 1301  | 1301  | 1301   | 1309  | 1302  | 1302   | 1301   | 1302   | 1301   | 1302   | 1303   | 1310   | 1301   | 1311  | 1301  | 1301   | 1303    | Uric acid/Calcium oxalate |
| 1223  | 1223  | 1223   | 1225  | 1223  | 1224   | 1223   | 1223   | 1223   | 1222   | 1223   | 1223   | 1222   | 1228  | 1218  | 1223   | 1223    | Uric acid                 |
| 1120  | 1120  | 1121   | 1121  | 1121  | 1121   | 1121   | 1121   | 1120   | 1121   | 1120   | 1121   | 1120   | 1122  | 1112  | 1121   | 1120    | Uric acid                 |
| 1025  | 1025  | 1025   | 1025  | 1025  | 1026   | 1025   | 1026   | 1025   | 1026   | 1026   | 1025   | 1025   | 1026  | 1025  | 1026   | 1025    | Uric acid                 |
| 990   | 989   | 990    | 990   | 990   | 990    | 990    | 990    | 990    | 990    | 989    | 990    | 990    | 991   | 985   | 990    | 990     | Uric acid                 |
| 875   | 875   | 875    | 876   | 875   | 876    | 875    | 875    | 875    | 876    | 876    | 876    | 875    | 876   | 876   | 875    | 875     | Uric acid                 |
| 778   | 778   | 779    | 778   | 779   | 781    | 779    | 780    | 778    | 780    | 780    | 779    | 778    | 778   | 783   | 779    | 779     | Uric acid                 |
| 742   | 742   | 742    | 743   | 742   | 743    | 742    | 743    | 741    | 743    | 743    | 743    | 742    | 744   | 744   | 743    | 743     | Uric acid                 |
| 703   | 703   | 703    | 704   | 703   | 702    | 703    | 703    | 703    | 704    | 702    | 703    | 703    | 704   | 699   | 703    | 703     | Uric acid                 |
| 616   | 616   | 617    | 617   | 616   | 617    | 617    | 617    | 616    | 617    | 616    | 617    | 616    | 617   | 614   | 617    | 616     | Uric acid                 |
| 571   | 571   | 572    | 572   | 572   | 572    | 571    | 572    | 572    | 572    | 571    | 572    | 571    | 573   | 570   | 572    | 572     | Uric acid                 |
| 519   | 519   | 519    | 518   | 519   | 519    | 520    | 520    | 519    | 520    | 515    | 518    | 511    | 517   | 512   | 520    | 518     | Uric acid                 |
| 470   | 470   | 470    | 471   | 470   | 471    | 469    | 470    | 470    | 470    | 470    | 470    | 469    | 471   | 468   | 470    | 470     | Uric acid                 |

**Table S2c** - FTIR data for CaP urinary stones (wavenumbers expressed in cm<sup>-1</sup>).

| <b>KS006B</b> | <b>KS008</b> | <b>Chemical phases</b>             |
|---------------|--------------|------------------------------------|
| 3542          | -            | Brushite                           |
| 3474          | -            | Brushite                           |
| -             | 3292         | Carbonated apatite/Calcium oxalate |
| 3268          | -            | Brushite                           |
| 3155          | -            | Brushite                           |
| 1644          | -            | Brushite                           |
| -             | 1621         | Calcium oxalate                    |
| -             | 1461         | Carbonated apatite                 |
| -             | 1421         | Carbonated apatite                 |
| 1323          | 1317         | Calcium oxalate                    |
| 1205          | -            | Brushite                           |
| 1135          | -            | Brushite                           |
| -             | 1026         | Carbonated apatite                 |
| 1059          | -            | Brushite                           |
| 986           | 962          | Carbonated apatite/Brushite        |
| 872           | 878          | Carbonated apatite/Brushite        |
| 784           | 780          | Brushite/Calcium oxalate           |
| 655           | 666          | Brushite/Calcium oxalate           |
| -             | 601          | Carbonated apatite                 |
| 577           | -            | Brushite                           |
| -             | 561          | Carbonated apatite                 |
| 523           | -            | Brushite                           |

**Table S2d** - FTIR data for mixed urinary stones (wavenumbers expressed in cm<sup>-1</sup>).

| <b>KS002</b> | <b>KS039</b> | <b>KS041</b> | <b>KS007</b> | <b>KS032B</b> | <b>KS047</b> | <b>Average</b> | <b>Chemical phases</b>      |
|--------------|--------------|--------------|--------------|---------------|--------------|----------------|-----------------------------|
| 3426         | 3444         | 3460         | 3426         | 3460          | 3428         | 3441           | Calcium Oxalate             |
| 3325         | 3322         | -            | 3337         | -             | 3336         | 3330           | Calcium Oxalate             |
| -            | -            | -            | 3247         | 3306          | 3256         | 3270           | Calcium Oxalate             |
| -            | -            | -            | 3049         | -             | 3046         | 3048           | Calcium Oxalate             |
| 3011         | 3089         | 3013         | -            | -             | -            | 3038           | Uric acid                   |
| -            | 2994         | 2898         | -            | -             | -            | 2946           | Uric acid                   |
| -            | 2924         | -            | -            | -             | 2919         | 2922           | Uric acid/Organic matter    |
| 2822         | 2802         | 2803         | -            | -             | 2848         | 2819           | Uric acid/Organic matter    |
| 2689         | 2693         | 2673         | -            | -             | -            | 2685           | Uric acid                   |
| 2606         | 2605         | -            | -            | -             | -            | 2606           | Uric acid                   |
| 1655         | 1652         | 1631         | -            | -             | -            | 1646           | Uric acid                   |
| 1617         | -            | -            | 1613         | 1616          | 1615         | 1615           | Calcium Oxalate             |
| -            | 1587         | 1591         | -            | -             | -            | 1589           | Ammonium urate/Uric acid    |
| -            | -            | 1540         | -            | -             | -            | 1540           | Ammonium urate              |
| -            | 1486         | -            | -            | -             | -            | 1486           | Uric acid                   |
| 1435         | 1436         | 1430         | -            | -             | -            | 1433           | Uric acid                   |
| 1399         | 1399         | 1386         | -            | -             | -            | 1395           | Uric acid                   |
| 1348         | 1348         | 1341         | -            | -             | -            | 1346           | Uric acid                   |
| 1313         | 1311         | 1315         | 1314         | 1319          | 1313         | 1314           | Calcium Oxalate             |
| -            | -            | 1273         | -            | -             | -            | 1273           | Ammonium urate              |
| 1229         | 1228         | -            | -            | -             | -            | 1228           | Uric acid                   |
| -            | -            | 1138         | -            | -             | -            | 1138           | Ammonium urate              |
| 1122         | 1122         | 1124         | -            | -             | -            | 1123           | Uric acid                   |
| 1026         | 1026         | 1027         | 1038         | 1031          | 1036         | 1030           | Uric acid/Calcium phosphate |
| -            | -            | 1003         | -            | -             | -            | 1003           | Ammonium urate              |
| -            | 991          | -            | -            | 963           | 949          | 968            | Uric acid/Calcium phosphate |
| -            | -            | -            | 951          | -             | -            | 951            | Calcium Oxalate             |
| -            | -            | -            | -            | 913           | -            | 913            | Calcium phosphate           |
| 877          | 876          | 883          | 882          | -             | 884          | 880            | Calcium Oxalate/Uric acid   |
| 779          | 778          | 780          | 779          | 778           | 779          | 779            | Calcium Oxalate/Uric acid   |
| -            | -            | 768          | -            | -             | -            | 768            | Ammonium urate              |
| 744          | 744          | 744          | -            | -             | -            | 744            | Uric acid                   |
| 704          | 704          | -            | -            | -             | -            | 704            | Uric acid                   |
| -            | -            | 722          | -            | -             | -            | 722            | Ammonium urate              |
| 655          | -            | 635          | 659          | -             | 661          | 652            | Calcium Oxalate             |
| -            | 617          | 597          | -            | -             | -            | 607            | Ammonium urate/Uric acid    |
| -            | -            | -            | 601          | 603           | 603          | 603            | Calcium phosphate           |
| 573          | 573          | -            | 571          | 563           | 565          | 569            | Uric acid/Calcium phosphate |
| 517          | 517          | 522          | 513          | 515           | 514          | 516            | Calcium Oxalate/Uric acid   |
| 473          | 471          | 487          | -            | -             | -            | 477            | Uric acid                   |

**Table S3** - Average concentration of major (>1 wt.%, in bold) and trace elements (<1wt.%) detected for urinary stones by EDS.

| Sample ID | Mineral phases | Ca           | P            | S           | Na          | Zn          | Mg          | Al | Si          | Cl          |
|-----------|----------------|--------------|--------------|-------------|-------------|-------------|-------------|----|-------------|-------------|
| KS013     | Ca-Oxalates    | 28.66        |              |             |             |             |             |    |             |             |
|           | Ca-Oxalates    | 26.31        | 0.21         | 0.08        |             |             |             |    |             |             |
|           | Ca-Oxalates    | 25.08        | 0.08         |             |             |             |             |    |             |             |
|           | Ca-Oxalates    | 24.37        | 0.13         | 0.10        |             |             |             |    |             |             |
|           | Ca-Oxalates    | 26.63        |              |             |             |             |             |    |             |             |
|           | Ca-Oxalates    | 28.09        |              | 0.13        |             |             |             |    |             | 0.08        |
|           | Ca-Oxalates    | 24.16        | 0.35         | 0.31        |             |             |             |    |             |             |
|           | Ca-Oxalates    | 24.50        | 0.37         | 0.31        |             |             |             |    |             |             |
|           | Ca-Oxalates    | 24.93        | 0.38         | 0.29        |             |             |             |    | 0.04        |             |
|           | Ca-Oxalates    | 25.40        | 0.33         | 0.31        |             |             |             |    |             |             |
|           | Ca-Oxalates    | 24.35        | 0.26         | 0.25        |             |             |             |    |             |             |
|           | Ca-Oxalates    | 24.81        | 0.25         | 0.35        |             |             |             |    |             |             |
|           | <i>Average</i> | <b>25.61</b> | <b>0.26</b>  | <b>0.24</b> |             |             |             |    | <b>0.04</b> | <b>0.08</b> |
|           | <i>σ</i>       | 1.50         | 0.11         | 0.10        |             |             |             |    |             |             |
| KS028B    | Ca-Oxalates    | 27.87        | 0.06         |             |             |             |             |    |             |             |
|           | Ca-Oxalates    | 31.56        | 0.10         | 0.09        |             |             |             |    |             |             |
|           | Ca-Oxalates    | 29.34        |              |             |             |             |             |    |             |             |
|           | Ca-Oxalates    | 32.76        |              |             |             |             |             |    |             |             |
|           | Ca-Oxalates    | 27.95        |              | 0.10        |             |             |             |    |             | 0.08        |
|           | Ca-Oxalates    | 26.94        | 0.13         |             |             |             |             |    |             |             |
|           | Ca-Oxalates    | 31.13        |              |             |             |             |             |    |             | 0.08        |
|           | Ca-Oxalates    | 29.22        |              |             |             |             |             |    |             | 0.06        |
|           | <i>Average</i> | <b>29.60</b> | <b>0.10</b>  | <b>0.10</b> |             |             |             |    |             | <b>0.07</b> |
|           | <i>σ</i>       | 2.04         | 0.04         | 0.01        |             |             |             |    |             | 0.01        |
| KS008     | Ca-Oxalates    | 26.21        |              |             |             |             |             |    |             |             |
|           | <i>Average</i> | <b>26.21</b> |              |             |             |             |             |    |             |             |
|           | <i>σ</i>       | -            |              |             |             |             |             |    |             |             |
|           | Ca-Phosphates  | 31.79        | 17.60        |             | 0.90        |             | 0.84        |    |             |             |
|           | Ca-Phosphates  | 28.60        | 15.39        |             | 0.80        |             | 0.63        |    |             | 0.28        |
|           | Ca-Phosphates  | 27.74        | 14.00        |             | 0.57        |             | 0.51        |    |             | -           |
|           | Ca-Phosphates  | 31.51        | 17.34        |             | 0.83        | 0.18        | 0.89        |    |             | 0.19        |
|           | Ca-Phosphates  | 31.51        | 17.49        |             | 1.00        | 0.17        | 0.86        |    |             | -           |
|           | <i>Average</i> | <b>30.23</b> | <b>16.36</b> |             | <b>0.82</b> | <b>0.18</b> | <b>0.75</b> |    |             | <b>0.24</b> |
|           | <i>σ</i>       | 1.91         | 1.60         |             | 0.16        | 0.01        | 0.17        |    |             | 0.06        |
